# Supplementary material for: Assembling two Dy2 single-molecule magnets with different energy barriers via fine-tuning the geometries of DyIII sites
Source: Royal Society of Chemistry journal article supplement (doi:10.1039/d0nj04009f), 2020-01-01
Supplement: d0nj04009f1.pdf [file d0nj04009f1.pdf]

# Assembling two Dy<sub>2</sub> single-molecule magnets with different energy barriers via fine-tuning the geometries of Dy<sup>III</sup> sites

Dawei Li,<sup>a</sup> Man-Man Ding,<sup>b</sup> Yu Ge,<sup>a</sup> David Felipe Tello Yepes,<sup>d</sup> Mingyuan Sun,<sup>a</sup> Muhammad Saleem Najib,<sup>d</sup> Yahong Li,<sup>\*a</sup> Yi-Quan Zhang<sup>\*b</sup> and Jin-lei Yao<sup>\*c</sup>

<sup>a</sup> College of Chemistry, Chemical Engineering and Materials Science Soochow University, Suzhou 215123, China

E-mail: liyahong@suda.edu.cn.

<sup>b</sup> Jiangsu Key Laboratory for NSLSCS, School of Physical Science and Technology, Nanjing Normal University, Nanjing 210023, China

E-mail: zhangyiquan@njnu.edu.cn

<sup>c</sup> Jiangsu Key Laboratory of Micro and Nano Heat Fluid Flow Technology and Energy Application, School of Mathematics and Physics, Suzhou University of Science and Technology, Suzhou 215009, China

E-mail: jlyao@usts.edu.cn.

<sup>d</sup> College of Environmental Engineering, University of Waterloo, Waterloo N2L3G1, Canada

## Supplementary Information Contents

|                                                                                                                                                                                    |    |
|------------------------------------------------------------------------------------------------------------------------------------------------------------------------------------|----|
| 1. <sup>1</sup> H, <sup>13</sup> C NMR spectra of H <sub>2</sub> L <sup>1</sup> and H <sub>2</sub> L <sup>2</sup> .....                                                            | 2  |
| 2. PXRD patterns of <b>1</b> and <b>2</b> .....                                                                                                                                    | 4  |
| 3. IR spectra of H <sub>2</sub> L <sup>1</sup> , H <sub>2</sub> L <sup>2</sup> , <b>1</b> and <b>2</b> .....                                                                       | 5  |
| 4. Selected bond lengths and angles for <b>1</b> and <b>2</b> .....                                                                                                                | 6  |
| 5. SHAPE program details for <b>1</b> and <b>2</b> .....                                                                                                                           | 9  |
| 6. Examples of eight-coordinated Dy <sub>2</sub> SMMs bearing [Dy <sub>2</sub> O <sub>2</sub> ] moieties .....                                                                     | 10 |
| 7. lnτ versus T <sup>-1</sup> plots for complexes <b>1</b> and <b>2</b> at high temperature .....                                                                                  | 11 |
| 8. Temperature dependence of the χ'' plots for complex <b>1</b> and the diluted sample at indicated frequencies under 0 Oe (Fig. S6), 200 Oe (Fig. S7) and 4000 Oe (Fig. S8) ..... | 12 |
| 9. Plot of ln(τ) vs 1/T for <b>1</b> and the diluted sample .....                                                                                                                  | 15 |
| 10. Best fitted parameters for complexes <b>1</b> and <b>2</b> under 0 Oe dc field .....                                                                                           | 16 |
| 11. Computational details .....                                                                                                                                                    | 18 |

1.  $^1\text{H}$ ,  $^{13}\text{C}$  NMR spectra of  $\text{H}_2\text{L}^1$  and  $\text{H}_2\text{L}^2$

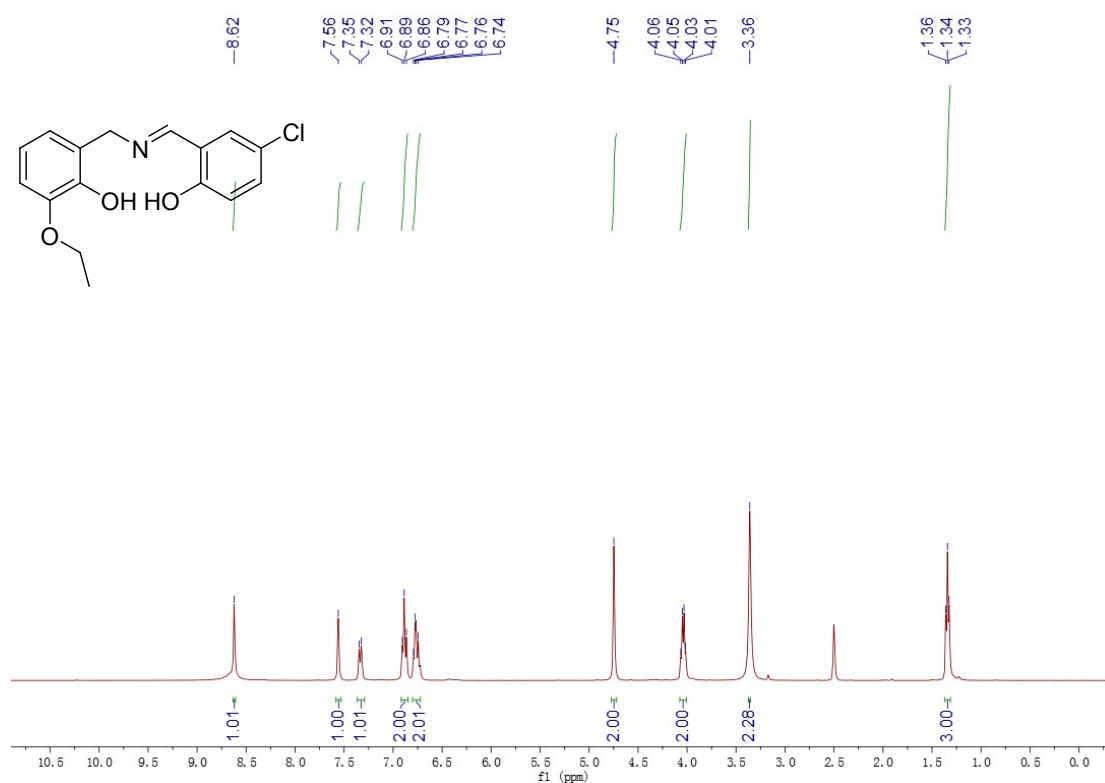

(a)

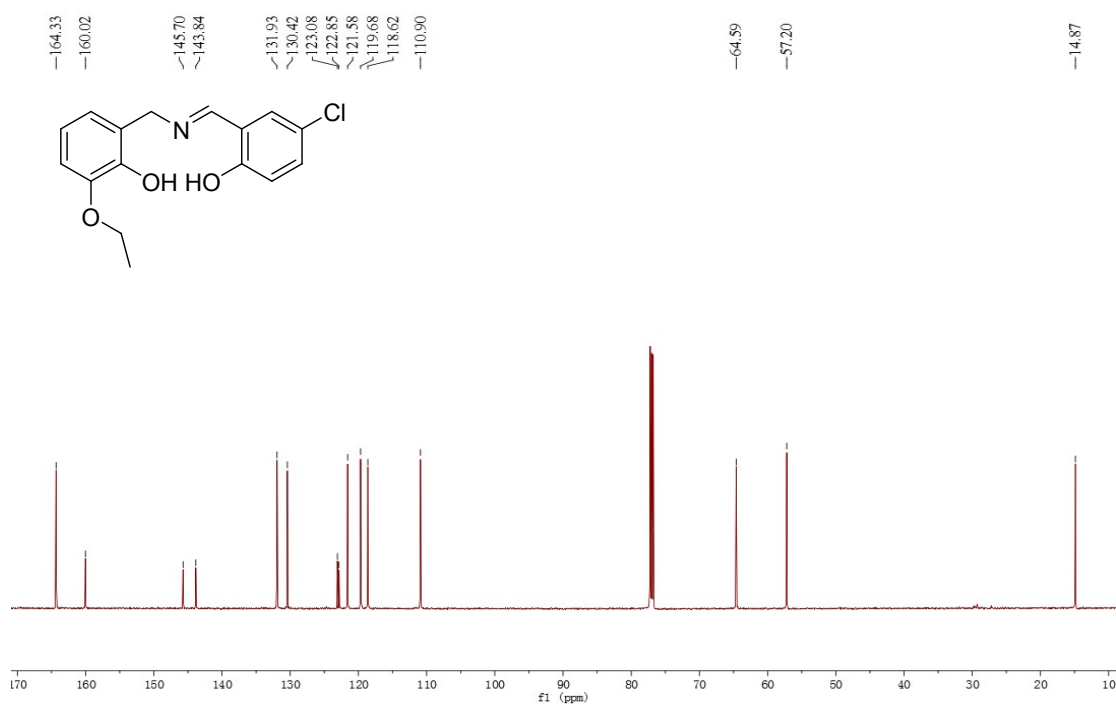

(b)

Fig. S1 The  $^1\text{H}$  NMR (a) and  $^{13}\text{C}$  NMR (b) spectra of  $\text{H}_2\text{L}^1$ .

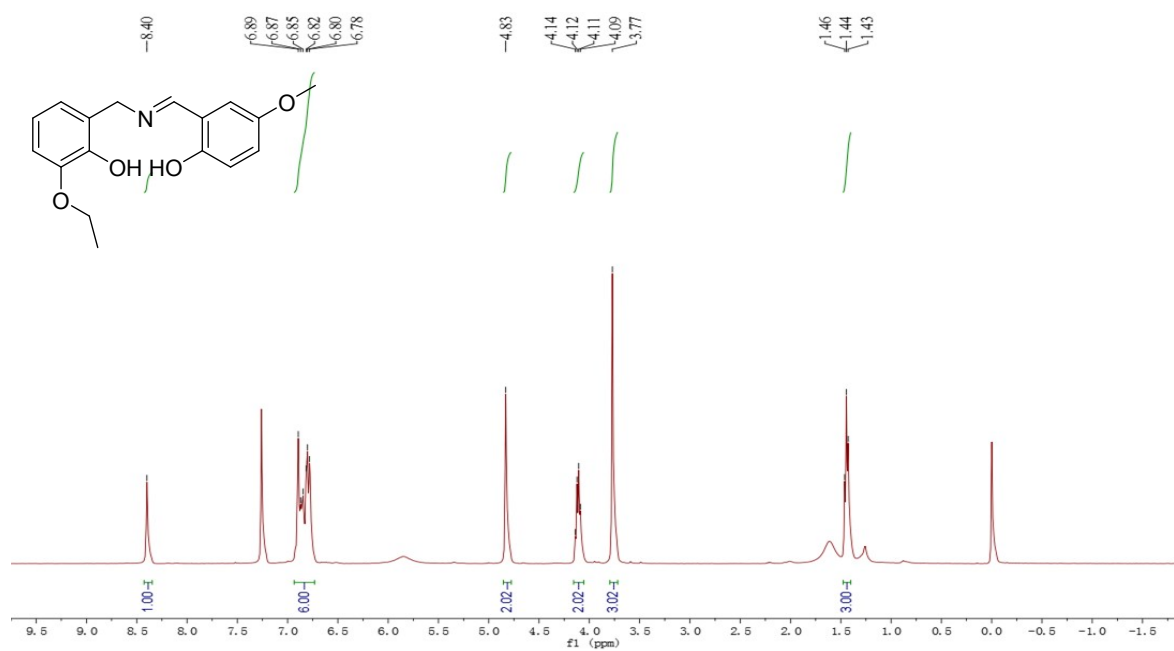

(c)

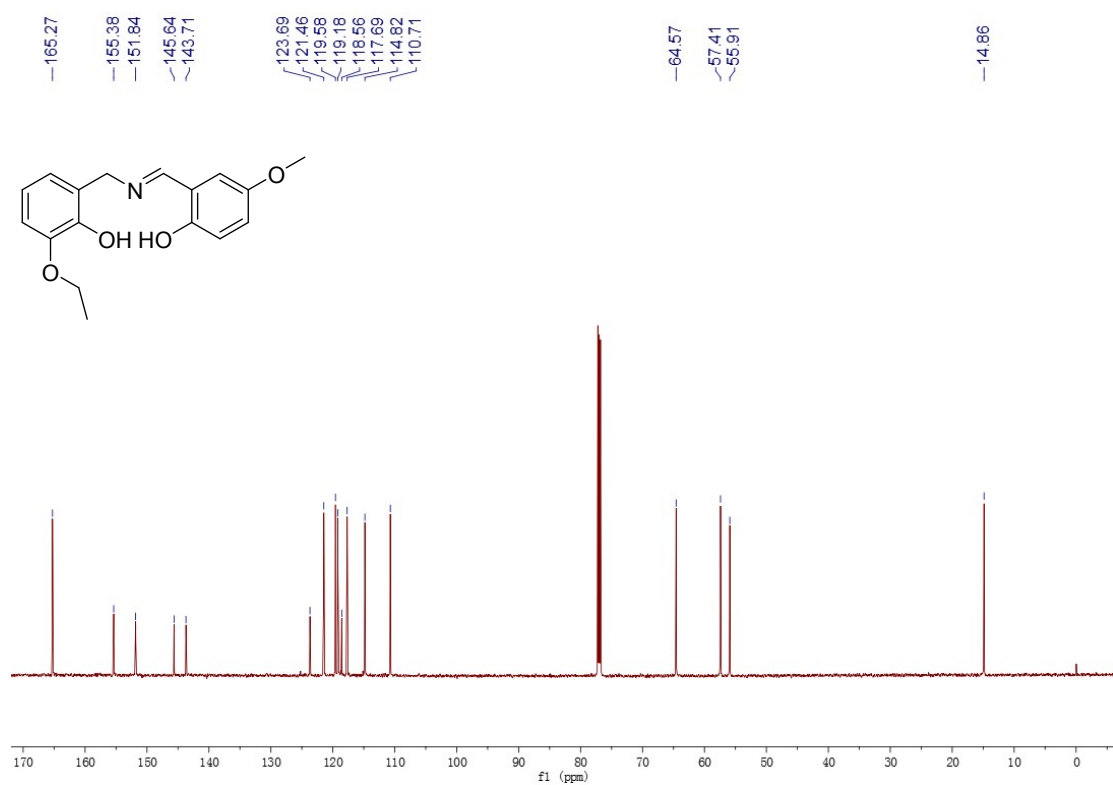

(d)

**Fig. S2** The  $^1H$  NMR (c) and  $^{13}C$  NMR (d) spectra of  $H_2L^2$ .

## 2. PXRD patterns of **1** and **2**

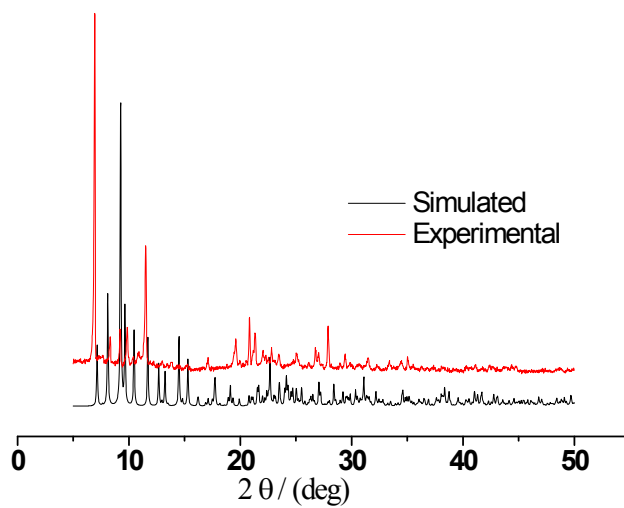

(a)

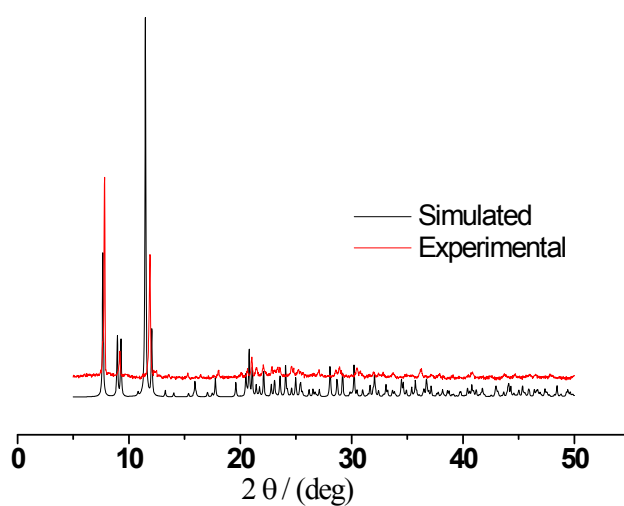

(b)

**Fig. S3** PXRD patterns of **1**(a) and **2** (b).

### 3. IR spectra of $H_2L^1$ , $H_2L^2$ , **1** and **2**

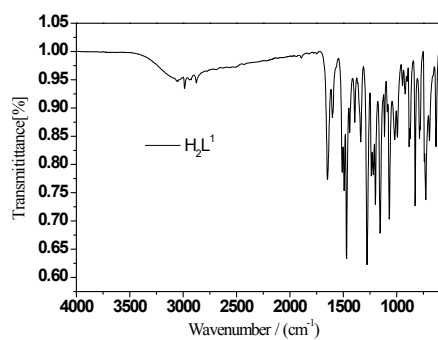

(a)

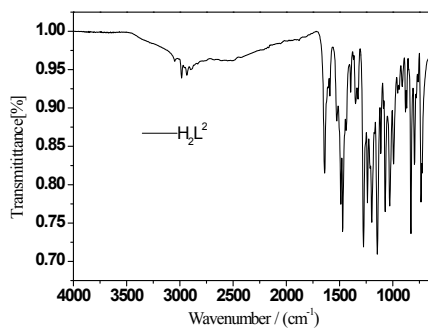

(b)

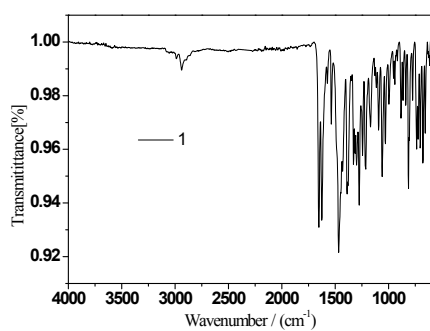

(c)

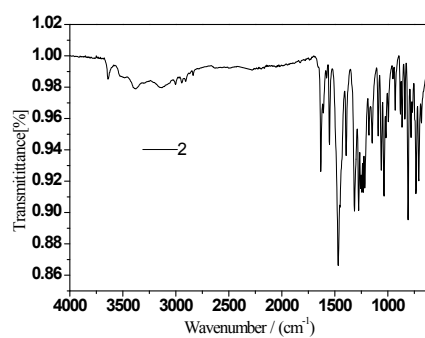

(d)

**Fig. S4** FT-IR spectra of  $H_2L^1$  (a),  $H_2L^2$  (b), **1** (c) and **2** (d).

#### 4. Selected bond lengths and angles for **1** and **2**

**Table S1** Selected bond lengths (Å) and angle (°) for complexes **1** and **2**

| <b>1</b>   |           |             |           |
|------------|-----------|-------------|-----------|
| Dy1-O7     | 2.480(8)  | Dy2-O9      | 2.315(9)  |
| Dy1-O10    | 2.175(8)  | Dy2-O1      | 2.391(7)  |
| Dy1-O9     | 2.282(7)  | Dy2-O15     | 2.478(11) |
| Dy1-O1     | 2.370(9)  | Dy2-O2      | 2.216(8)  |
| Dy1-O3     | 2.370(8)  | Dy2-O13     | 2.498(10) |
| Dy1-N3     | 2.531(11) | Dy2-O12     | 2.446(9)  |
| Dy1-O4     | 2.479(11) | Dy2-O11     | 2.298(9)  |
| Dy1-O5     | 2.454(10) | Dy2-N1      | 2.452(11) |
| O7-Dy1-N3  | 149.0(3)  | O9-Dy2-O1   | 67.6(3)   |
| O10-Dy1-O7 | 78.6(3)   | O9-Dy2-O15  | 66.1(3)   |
| O10-Dy1-O9 | 149.0(3)  | O9-Dy2-O13  | 73.9(3)   |
| O10-Dy1-O1 | 141.4(3)  | O9-Dy2-O12  | 84.1(3)   |
| O10-Dy1-O3 | 83.7(3)   | O9-Dy2-N1   | 142.6(3)  |
| O10-Dy1-N3 | 74.5(3)   | O1-Dy2-O15  | 120.1(3)  |
| O10-Dy1-O4 | 86.1(4)   | O1-Dy2-O13  | 123.5(3)  |
| O10-Dy1-O5 | 91.2(4)   | O1-Dy2-O12  | 83.7(3)   |
| O9-Dy1-O7  | 132.3(3)  | O1-Dy2-N1   | 78.1(3)   |
| O9-Dy1-O1  | 68.5(3)   | O15-Dy2-O13 | 75.8(3)   |
| O9-Dy1-O3  | 99.4(3)   | O2-Dy2-O9   | 140.5(3)  |
| O9-Dy1-N3  | 76.1(3)   | O2-Dy2-O1   | 151.9(3)  |
| O9-Dy1-O4  | 77.9(3)   | O2-Dy2-O15  | 81.1(3)   |
| O9-Dy1-O5  | 98.9(3)   | O2-Dy2-O13  | 77.2(3)   |
| O1-Dy1-O7  | 65.5(3)   | O2-Dy2-O12  | 98.8(3)   |
| O1-Dy1-N3  | 133.4(3)  | O2-Dy2-O11  | 85.7(4)   |
| O1-Dy1-O4  | 122.0(3)  | O2-Dy2-N1   | 75.2(3)   |

|            |          |             |          |
|------------|----------|-------------|----------|
| O1-Dy1-O5  | 88.5(4)  | O12-Dy2-O15 | 125.7(3) |
| O3-Dy1-O7  | 84.1(3)  | O12-Dy2-O13 | 52.0(3)  |
| O3-Dy1-O1  | 79.0(3)  | O12-Dy2-N1  | 77.7(3)  |
| O3-Dy1-N3  | 77.9(3)  | O11-Dy2-O9  | 106.3(3) |
| O3-Dy1-O4  | 154.4(3) | O11-Dy2-O1  | 82.3(3)  |
| O3-Dy1-O5  | 152.2(4) | O11-Dy2-O15 | 76.5(3)  |
| O4-Dy1-O7  | 116.8(3) | O11-Dy2-O13 | 149.3(3) |
| O4-Dy1-N3  | 76.7(3)  | O11-Dy2-O12 | 157.7(4) |
| O5-Dy1-O7  | 68.1(4)  | O11-Dy2-N1  | 82.5(4)  |
| O5-Dy1-N3  | 127.1(4) | N1-Dy2-O15  | 149.3(3) |
| O5-Dy1-O4  | 51.2(4)  | N1-Dy2-O13  | 116.5(3) |
| Dy1-O9-Dy2 | 113.0(3) | Dy1-O1-Dy2  | 107.2(3) |

---

**2**

---

|             |            |             |          |
|-------------|------------|-------------|----------|
| Dy1-O4      | 2.427(7)   | Dy1-O2      | 2.170(6) |
| Dy1-O1      | 2.301(6)   | Dy1-O3      | 2.372(6) |
| Dy1-O11     | 2.356(5)   | Dy1-O5      | 2.484(6) |
| Dy1-O81     | 2.507(6)   | Dy1-N1      | 2.460(6) |
| O1-Dy11     | 2.356(5)   | O8-Dy11     | 2.507(6) |
| O4-Dy1-O81  | 72.9(2)    | O3-Dy1-O5   | 153.4(2) |
| O4-Dy1-O5   | 51.9(2)    | O3-Dy1-N1   | 78.8(2)  |
| O4-Dy1-N1   | 124.7(2)   | O5-Dy1-O81  | 123.1(2) |
| O1-Dy1-O4   | 99.2(2)    | N1-Dy1-O81  | 146.0(2) |
| O11-Dy1-O4  | 91.5(2)    | N1-Dy1-O5   | 74.6(2)  |
| O1-Dy1-O11  | 67.0(2)    | N2-O4-Dy1   | 97.5(5)  |
| O1-Dy1-O81  | 131.37(19) | Dy1-O1-Dy11 | 106.0(2) |
| O11-Dy1-O81 | 65.39(19)  | O2-Dy1-O1   | 150.1(2) |
| O1-Dy1-O3   | 99.9(2)    | O2-Dy1-O11  | 142.6(2) |
| O11-Dy1-O3  | 78.0(2)    | O2-Dy1-O81  | 78.4(2)  |

|            |          |            |          |
|------------|----------|------------|----------|
| O1-Dy1-O5  | 76.2(2)  | O2-Dy1-O3  | 86.9(2)  |
| O11-Dy1-O5 | 122.4(2) | O2-Dy1-O5  | 84.7(2)  |
| O11-Dy1-N1 | 133.7(2) | O2-Dy1-N1  | 74.6(2)  |
| O1-Dy1-N1  | 78.3(2)  | O3-Dy1-O4  | 152.4(2) |
| O2-Dy1-O4  | 86.3(2)  | O3-Dy1-O81 | 79.5(2)  |

---

Symmetry transformations used to generate equivalent atoms:  $1-X, +Y, 3/2-Z$



## 5. SHAPE program details for **1** and **2**

**Table S2** Agreement factors between the coordination polyhedron of the Dy<sup>III</sup> ions in Dy<sub>2</sub> and the various ideal polyhedrons calculated by the SHAPE program.

| Agreement factors for Dy <sup>III</sup> ion in complexes | <i>TDD-8(D<sub>2d</sub>)</i> | <i>SAPR-8(D<sub>4d</sub>)</i> |
|----------------------------------------------------------|------------------------------|-------------------------------|
| Dy <sup>III</sup> in <b>1</b>                            | <b>2.737</b>                 | 4.739                         |
|                                                          | 2.038                        | <b>1.911</b>                  |
| Dy <sup>III</sup> in <b>2</b>                            | <b>2.584</b>                 | 4.860                         |
|                                                          | <b>2.584</b>                 | 4.860                         |

*TDD-8(D<sub>2d</sub>)* = Triangular dodecahedron

*SAPR-8(D<sub>4d</sub>)* = Square antiprism

## 6. Examples of eight-coordinated Dy<sub>2</sub> SMMs bearing [Dy<sub>2</sub>O<sub>2</sub>] moieties

**Table S3** Examples of eight-coordinated Dy<sub>2</sub> SMMs bearing [Dy<sub>2</sub>O<sub>2</sub>] moieties

| Complexes                                                                                                                    | Solvent ligand   | Donors                        | Symmetry                           | Magnetic behavior | Dy···Dy distance / Å | Dy-O-Dy angle / ° | τ <sub>0</sub> /s     | U <sub>eff</sub> /K <sub>B</sub> (K) |
|------------------------------------------------------------------------------------------------------------------------------|------------------|-------------------------------|------------------------------------|-------------------|----------------------|-------------------|-----------------------|--------------------------------------|
| [Dy <sub>2</sub> (bfbpen) <sub>2</sub> (H <sub>2</sub> O) <sub>2</sub> ]·2I <sup>-</sup> <sup>S1a</sup>                      | H <sub>2</sub> O | N <sub>4</sub> O <sub>4</sub> | D <sub>4d</sub>                    | AF                | 3.845                | 109.45            | 3.68×10 <sup>-6</sup> | 20.9 (0 Oe)<br>26.9 (1200 Oe)        |
| [Dy <sub>2</sub> (bcbpen) <sub>2</sub> (H <sub>2</sub> O) <sub>2</sub> ]·2I <sup>-</sup> ·0.5H <sub>2</sub> O <sup>S1a</sup> | H <sub>2</sub> O | N <sub>4</sub> O <sub>4</sub> | D <sub>4d</sub>                    | AF                | 3.861                | 110.01            | 6.79×10 <sup>-7</sup> | 72.7 (0 Oe)                          |
| [Dy <sub>2</sub> (hmi) <sub>2</sub> (NO <sub>3</sub> ) <sub>2</sub> (MeOH) <sub>2</sub> ] <sup>S1b</sup>                     | MeOH             | NO <sub>7</sub>               | /                                  | F                 | 3.750                | 106.41            | 3×10 <sup>-7</sup>    | 56 (0 Oe)                            |
| [Dy <sub>2</sub> (L <sup>1</sup> ) <sub>2</sub> (NO <sub>3</sub> ) <sub>2</sub> (MeOH) <sub>2</sub> ] <sup>S1c</sup>         | MeOH             | NO <sub>7</sub>               | D <sub>2d</sub>                    | F                 | 3.787                | 109.32            | 2.66×10 <sup>-7</sup> | 198.8(0 Oe)                          |
| [Dy <sub>2</sub> (L <sup>1</sup> ) <sub>2</sub> (NO <sub>3</sub> ) <sub>2</sub> (EtOH) <sub>2</sub> ] <sup>S1c</sup>         | EtOH             | NO <sub>7</sub>               | D <sub>2d</sub>                    | F                 | 3.774                | 108.84            | 2.16×10 <sup>-6</sup> | 131.3(0 Oe)                          |
| [Dy <sub>2</sub> (L <sup>2</sup> ) <sub>2</sub> (NO <sub>3</sub> ) <sub>2</sub> (MeOH) <sub>2</sub> ]·2MeOH <sup>S1d</sup>   | MeOH             | NO <sub>7</sub>               | D <sub>2d</sub>                    | F                 | 3.7353               | 107.73            | 3.21×10 <sup>-5</sup> | 51.97(0 Oe)                          |
| Dy <sub>2</sub> (L <sup>3</sup> ) <sub>2</sub> (NO <sub>3</sub> ) <sub>2</sub> (MeOH) <sub>2</sub> <sup>S1d</sup>            | MeOH             | NO <sub>7</sub>               | D <sub>4d</sub>                    | F                 | 3.8397               | 111.13<br>111.69  | 6.74×10 <sup>-6</sup> | 87.16(0 Oe)                          |
| [Dy <sub>2</sub> (L <sup>4</sup> ) <sub>2</sub> (DBM) <sub>2</sub> (DMA) <sub>2</sub> ]·2DMA <sup>S1e</sup>                  | DMA              | NO <sub>7</sub>               | C <sub>2v</sub>                    | AF                | 3.7198               | 105.3             | 2.74×10 <sup>-8</sup> | 77 (0 Oe)                            |
| [Dy <sub>2</sub> (L <sup>4</sup> ) <sub>2</sub> (DBM) <sub>2</sub> (DMF) <sub>2</sub> ] <sup>S1e</sup>                       | DMF              | NO <sub>7</sub>               | C <sub>2v</sub>                    | AF                | 3.7270               | 106               | 1.36×10 <sup>-6</sup> | 24 (0 Oe)                            |
| [Dy <sub>2</sub> (L <sup>5</sup> ) <sub>2</sub> (piv) <sub>2</sub> ] <sup>S1f</sup>                                          | /                | N <sub>3</sub> O <sub>5</sub> | D <sub>2h</sub>                    | AF                | 3.798                | 110.19            | 3.06×10 <sup>-6</sup> | 40.32 (0 Oe)                         |
| [Dy <sub>2</sub> (L <sup>6</sup> ) <sub>2</sub> (piv) <sub>2</sub> ] <sup>S1f</sup>                                          | /                | N <sub>3</sub> O <sub>5</sub> | D <sub>2h</sub>                    | AF                | 3.810                | 106.74            | 9.19×10 <sup>-6</sup> | 31.67 (0 Oe)                         |
| [Dy <sub>2</sub> (L <sup>7</sup> ) <sub>2</sub> (piv) <sub>2</sub> ]·2MeCN <sup>S1f</sup>                                    | /                | N <sub>3</sub> O <sub>5</sub> | D <sub>2h</sub>                    | AF                | 3.8350/3.8226        | 109.07/108.38     | 2.17×10 <sup>-6</sup> | 33.53 (0 Oe)                         |
| [Dy <sub>2</sub> (L <sup>8</sup> ) <sub>2</sub> (NO <sub>3</sub> ) <sub>2</sub> (EtOH)(DMF)]·2EtOH <sup>[this work]</sup>    | EtOH<br>DMF      | NO <sub>7</sub>               | D <sub>2d</sub><br>D <sub>4d</sub> | F                 | 3.8326               | 113.0/107.2       | 4.64×10 <sup>-6</sup> | 86.91 (0 Oe)                         |
| [Dy <sub>2</sub> (L <sup>9</sup> ) <sub>2</sub> (NO <sub>3</sub> ) <sub>2</sub> (MeOH) <sub>2</sub> ] <sup>[this work]</sup> | MeOH             | NO <sub>7</sub>               | D <sub>2d</sub>                    | F                 | 3.7193               | 106.0             | 3.88×10 <sup>-6</sup> | 93.70 (0 Oe)                         |

H<sub>2</sub>bfbpen = N,N'-bis-(2-hydroxy-5-fluoro-benzyl)-N,N'-bis-(pyridin-2-ylmethyl)ethylenediamine, H<sub>2</sub>bcbpen = N,N'-bis-(2-hydroxy-5-chloro-benzyl)-N,N'-bis-(pyridin-2-ylmethyl)ethylenediamine, H<sub>2</sub>hmi = (2-hydroxy-3-methoxyphenyl)methylene (isonicotino)hydrazine, H<sub>2</sub>L<sup>1</sup> = 2-ethoxy-6-(((2-hydroxy-3-methoxy benzyl)imino)methyl)phenol, H<sub>2</sub>L<sup>2</sup> = 4-chloro-2-(((2-hydroxy-3-methoxybenzyl)imino)methyl)phenol, H<sub>2</sub>L<sup>3</sup> = 2-(((2-hydroxybenzylidene)amino)methyl)-6-methoxyphenol, H<sub>2</sub>L<sup>4</sup> = 2-hydroxy-N'-(2-hydroxy-3-methoxybenzylidene) benzohydrazide, HDBM = dibenzoylmethane, H<sub>2</sub>L<sup>5</sup> = N1,N3-bis (salicylaldehyde) diethylenetriamine, H<sub>2</sub>L<sup>6</sup> = N1,N3-bis(3-methoxysalicylidene)diethylenetriamine, H<sub>2</sub>L<sup>7</sup> = N1,N3-bis (5-chlorosalicylaldehyde)diethylenetriamine, H<sub>2</sub>L<sup>8</sup> = 4-chloro-2-(((3-ethoxy-2-hydroxybenzyl)imino)methyl)phenol (this work), H<sub>2</sub>L<sup>9</sup> = 2-(((3-ethoxy-2-hydroxybenzyl)imino)methyl)-4-methoxyphenol (this work), F = ferromagnetic, AF = antiferromagnetic.

7.  $\ln \tau$  versus  $T^{-1}$  plots for complexes **1** and **2** at high temperature

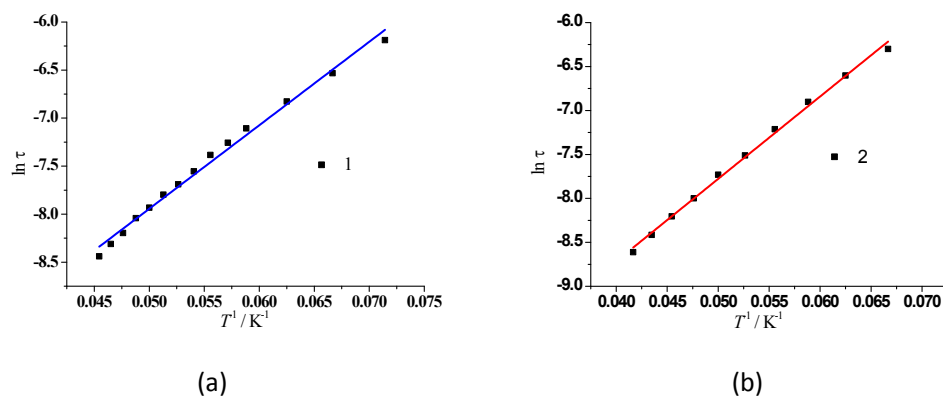

**Fig. S5**  $\ln \tau$  versus  $T^{-1}$  plots for **1** (a) and **2** (b) at the high temperature; the solid lines represent the least-squares fits of the experimental data to the Arrhenius law.

8. Temperature dependence of the  $\chi''$  plots for complex **1** and the diluted sample at indicated frequencies under 0 Oe (Fig. S6), 200 Oe (Fig. S7) , and 4000 Oe (Fig. S8).

100 Hz Zero field

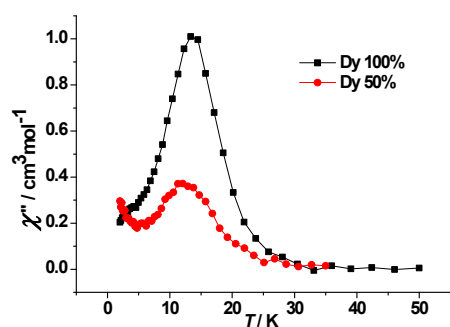

320 Hz Zero field

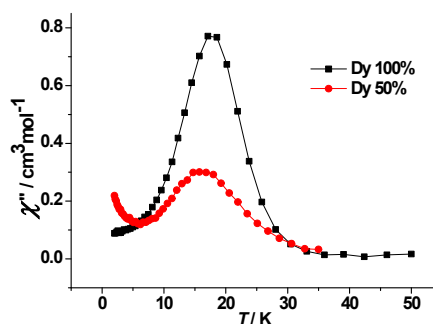

666 Hz Zero field

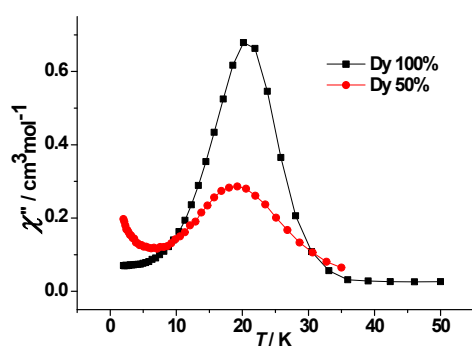

1000 Hz Zero field

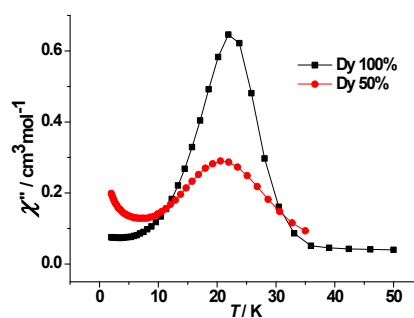

**Fig. S6** Temperature dependence of the  $\chi''$  plots for complex **1** and the diluted sample at indicated frequencies and 0 Oe applied field.

100 Hz 200 Oe field

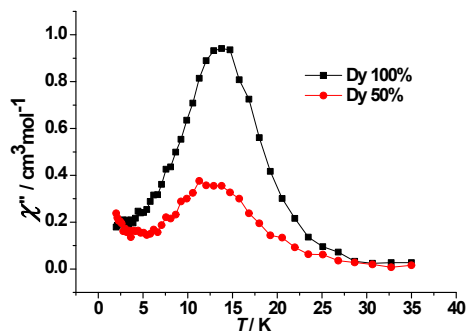

320 Hz 200 Oe field

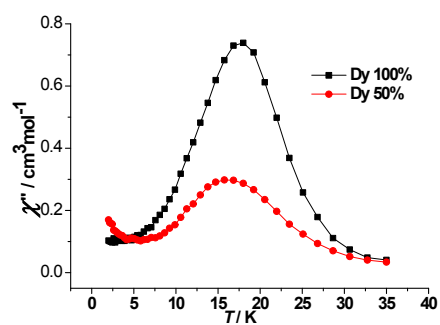

666 Hz 200 Oe field

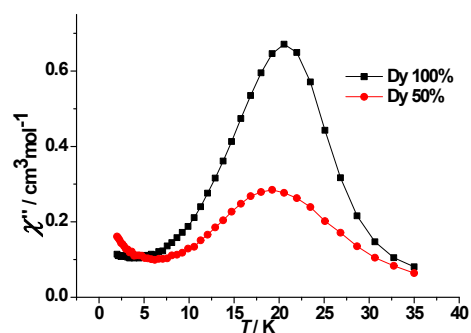

1000 Hz 200 Oe field

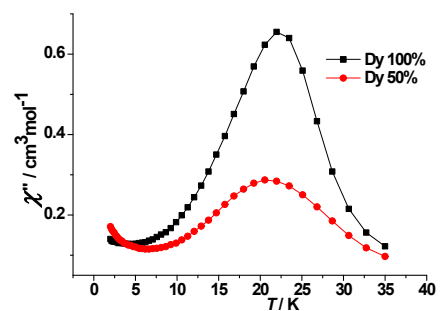

**Fig. S7** Temperature dependence of the  $\chi''$  plots for complex **1** and the diluted sample at indicated frequencies and 200 Oe applied field.

100 Hz 4000 Oe field

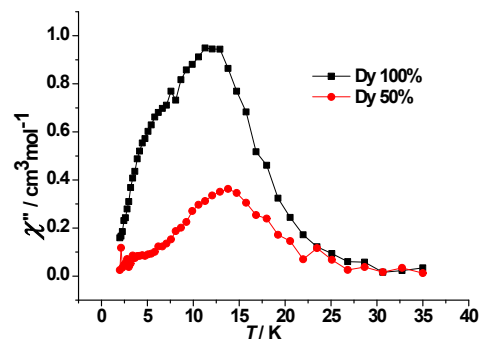

320 Hz 4000 Oe field

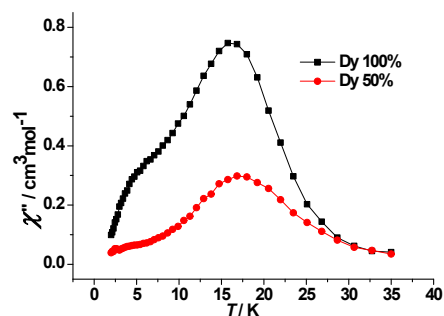

666 Hz 4000 Oe field

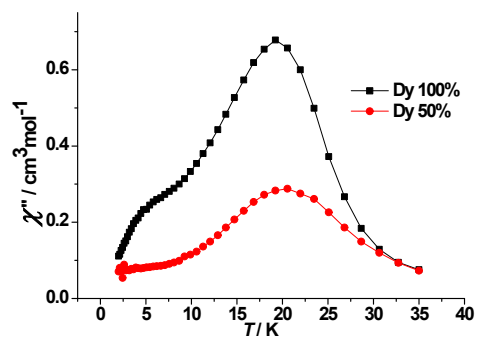

1000 Hz 4000 Oe field

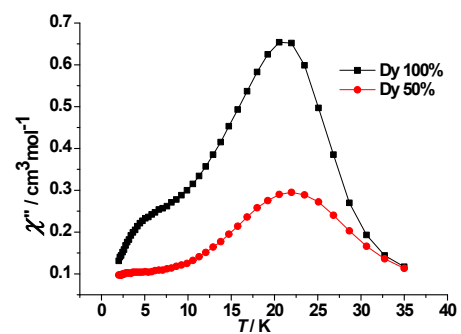

**Fig. S8** Temperature dependence of the  $\chi''$  plots for complex **1** and the diluted sample at indicated frequencies and 4000 Oe applied field.

9. Plot of  $\ln(\tau)$  vs  $1/T$  for **1** and the diluted sample

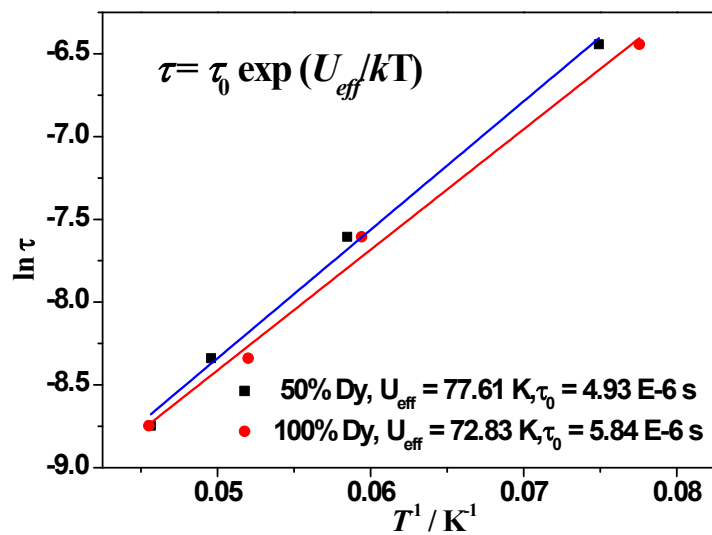

**Fig. S9** Plot of  $\ln(\tau)$  vs  $1/T$  for two samples. The effective energy barriers ( $U_{\text{eff}}/K_B$ ) obtained from the fits are indicated.

## 10. Best fitted parameters for complexes **1** and **2** under 0 Oe dc field

**Table S4** Parameters from the fitting of the Cole-Cole plots of **1** according to the generalized Debye model.

| Temperature / K | $\chi_s / \text{cm}^3\text{mol}^{-1}$ | $\chi_T / \text{cm}^3\text{mol}^{-1}$ | $\tau / \text{s}$ | $\alpha$ | $R$      |
|-----------------|---------------------------------------|---------------------------------------|-------------------|----------|----------|
| 10              | 2.30E-07                              | 3.85E+00                              | 1.04E-02          | 1.50E-01 | 6.59E-02 |
| 11              | 5.61E-07                              | 3.19E+00                              | 6.17E-03          | 1.20E-01 | 8.22E-02 |
| 12              | 9.61E-07                              | 2.71E+00                              | 3.88E-03          | 9.04E-02 | 1.82E-01 |
| 13              | 1.23E-06                              | 2.53E+00                              | 2.85E-03          | 1.01E-01 | 9.08E-02 |
| 14              | 1.88E-06                              | 2.32E+00                              | 2.05E-03          | 1.03E-01 | 3.36E-01 |
| 15              | 3.75E-06                              | 2.13E+00                              | 1.45E-03          | 8.17E-02 | 1.45E-01 |
| 16              | 6.54E-06                              | 2.00E+00                              | 1.08E-03          | 8.43E-02 | 1.33E-01 |
| 17              | 1.10E-05                              | 1.85E+00                              | 8.19E-04          | 8.57E-02 | 3.69E-01 |
| 17.5            | 1.71E-05                              | 1.79E+00                              | 7.06E-04          | 7.12E-02 | 9.17E-02 |
| 18              | 1.24E-05                              | 1.75E+00                              | 6.22E-04          | 7.48E-02 | 6.96E-02 |
| 18.5            | 1.82E-05                              | 1.64E+00                              | 5.23E-04          | 5.01E-02 | 2.94E-01 |
| 19              | 2.96E-05                              | 1.59E+00                              | 4.58E-04          | 4.29E-02 | 3.05E-01 |
| 19.5            | 3.88E-05                              | 1.58E+00                              | 4.11E-04          | 5.54E-02 | 1.37E-01 |
| 20              | 4.26E-05                              | 1.53E+00                              | 3.59E-04          | 4.62E-02 | 1.26E-01 |
| 20.5            | 1.58E-15                              | 1.51E+00                              | 3.22E-04          | 5.98E-02 | 5.70E-02 |
| 21              | 2.62E-15                              | 1.42E+00                              | 2.76E-04          | 2.56E-02 | 2.70E-01 |
| 21.5            | 3.31E-15                              | 1.40E+00                              | 2.46E-04          | 3.09E-02 | 2.16E-01 |
| 22              | 3.45E-15                              | 1.37E+00                              | 2.16E-04          | 2.24E-02 | 2.80E-01 |

**Table S5** Parameters from the fitting of the Cole-Cole plots of **2** according to the generalized Debye model.

| Temperature / K | $\chi_s / \text{cm}^3\text{mol}^{-1}$ | $\chi_T / \text{cm}^3\text{mol}^{-1}$ | $\tau / \text{s}$ | $\alpha$ | $R$      |
|-----------------|---------------------------------------|---------------------------------------|-------------------|----------|----------|
| 11              | 2.30E-02                              | 3.15E+00                              | 1.06E-02          | 7.46E-02 | 1.50E-01 |
| 12              | 5.66E-03                              | 2.70E+00                              | 6.26E-03          | 7.96E-02 | 5.15E-02 |



|    |          |          |          |          |          |
|----|----------|----------|----------|----------|----------|
| 13 | 1.36E-15 | 2.33E+00 | 3.83E-03 | 6.90E-02 | 2.06E-01 |
| 14 | 8.25E-16 | 2.18E+00 | 2.63E-03 | 7.43E-02 | 1.58E-01 |
| 15 | 6.32E-16 | 2.01E+00 | 1.84E-03 | 7.04E-02 | 6.72E-02 |
| 16 | 6.61E-16 | 1.91E+00 | 1.36E-03 | 8.37E-02 | 1.22E-01 |
| 17 | 8.51E-16 | 1.80E+00 | 1.01E-03 | 8.35E-02 | 1.52E-01 |
| 18 | 6.56E-16 | 1.65E+00 | 7.37E-04 | 6.88E-02 | 1.08E-01 |
| 19 | 3.95E-16 | 1.51E+00 | 5.46E-04 | 4.44E-02 | 5.40E-01 |
| 20 | 4.83E-16 | 1.47E+00 | 4.39E-04 | 5.97E-02 | 2.56E-01 |
| 21 | 5.19E-17 | 1.35E+00 | 3.36E-04 | 2.10E-02 | 1.68E-01 |
| 22 | 8.81E-17 | 1.31E+00 | 2.73E-04 | 3.56E-02 | 4.31E-02 |
| 23 | 9.59E-17 | 1.25E+00 | 2.21E-04 | 3.23E-02 | 2.42E-01 |
| 24 | 1.02E-16 | 1.21E+00 | 1.82E-04 | 4.29E-02 | 1.70E-01 |

## 11. Computational details

Both of binuclear complexes **1** and **2** have two types of magnetic center Dy<sup>III</sup> ions indicated as **1(Dy1)**, **1(Dy2)**, **2(Dy1)** and **2(Dy2)**, respectively. Complete-active-space self-consistent field (CASSCF) calculations on individual Dy<sup>III</sup> fragments for **1** and **2** (see Figure S1 for the calculated complete structures of **1** and **2**) on the basis of single-crystal X-ray determined geometry have been carried out with MOLCAS 8.4<sup>S1</sup> program package. Each individual Dy<sup>III</sup> fragment in **1** and **2** was calculated keeping the experimentally determined structure of the corresponding compound while replacing the neighboring Dy<sup>III</sup> ion by diamagnetic Lu<sup>III</sup>.

The basis sets for all atoms are atomic natural orbitals from the MOLCAS ANO-RCC library: ANO-RCC-VTZP for Dy<sup>III</sup>; VTZ for close N and O; VDZ for distant atoms. The calculations employed the second order Douglas-Kroll-Hess Hamiltonian, where scalar relativistic contractions were taken into account in the basis set and the spin-orbit couplings were handled separately in the restricted active space state interaction (RASSI-SO) procedure. Active electrons in 7 active spaces include all *f* electrons (CAS(9 in 7) in the CASSCF calculation. To exclude all the doubts, we calculated all the roots in the active space. We have mixed the maximum number of spin-free state which was possible with our hardware (all from 21 sextets, 128 from 224 quadruplets, 130 from 490 doublets for Dy<sup>II</sup>). SINGLE\_ANISO<sup>S2</sup> program was used to obtain the energy levels, *g* tensors, magnetic axes, *et al.*, based on the above CASSCF/RASSI-SO calculations.

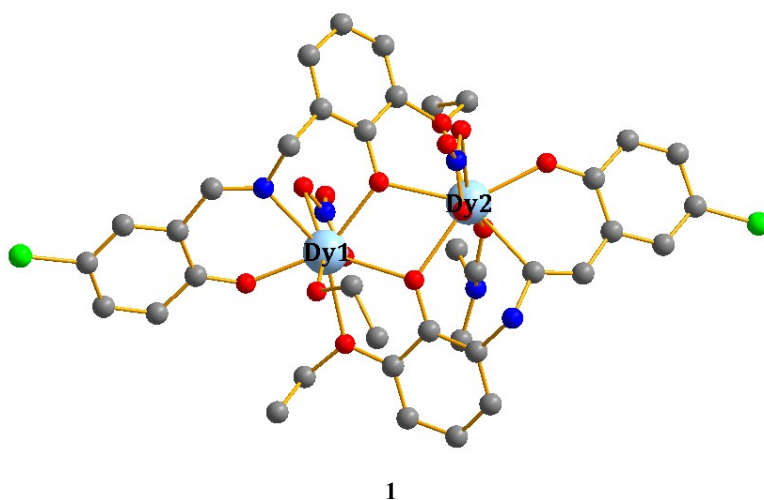

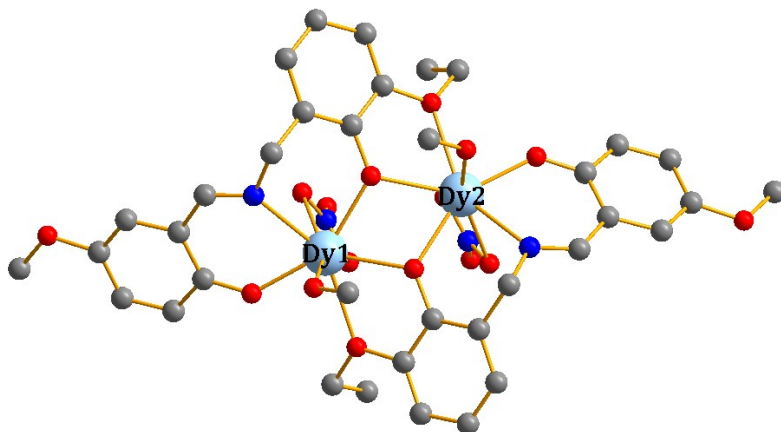

2

**Fig. S10** Calculated complete structures of complexes **1** and **2**; H atoms are omitted.

**Table S6** Calculated energy levels ( $\text{cm}^{-1}$ ),  $\mathbf{g}$  ( $g_x, g_y, g_z$ ) tensors and predominant  $m_J$  values of the lowest eight Kramers doublets (KDs) of individual  $\text{Dy}^{\text{III}}$  fragments for complexes **1** and **2** using CASSCF/RASSI-SO with MOLCAS 8.4.

| KDs | <b>1(Dy1)</b>      |              |            | <b>1(Dy2)</b>      |              |            |
|-----|--------------------|--------------|------------|--------------------|--------------|------------|
|     | $E/\text{cm}^{-1}$ | $\mathbf{g}$ | $m_J$      | $E/\text{cm}^{-1}$ | $\mathbf{g}$ | $m_J$      |
| 1   | 0.0                | 0.002        | $\pm 15/2$ | 0.0                | 0.002        | $\pm 15/2$ |
|     |                    | 0.003        |            |                    | 0.004        |            |
|     |                    | 19.716       |            |                    | 19.436       |            |
| 2   | 240.5              | 0.094        | $\pm 13/2$ | 167.2              | 0.055        | $\pm 13/2$ |
|     |                    | 0.113        |            |                    | 0.064        |            |
|     |                    | 16.614       |            |                    | 16.596       |            |
| 3   | 375.6              | 0.771        | $\pm 11/2$ | 327.7              | 0.269        | $\pm 11/2$ |
|     |                    | 0.851        |            |                    | 0.352        |            |
|     |                    | 13.378       |            |                    | 14.154       |            |
| 4   | 453.7              | 4.182        | $\pm 7/2$  | 425.8              | 3.515        | $\pm 9/2$  |
|     |                    | 6.072        |            |                    | 4.336        |            |
|     |                    | 10.511       |            |                    | 10.614       |            |
| 5   | 501.6              | 7.990        | $\pm 3/2$  | 479.9              | 11.443       | $\pm 5/2$  |
|     |                    | 6.413        |            |                    | 6.615        |            |
|     |                    | 2.537        |            |                    | 1.700        |            |
| 6   | 541.0              | 2.627        | $\pm 5/2$  | 548.4              | 0.459        | $\pm 3/2$  |
|     |                    | 6.114        |            |                    | 2.882        |            |
|     |                    | 11.155       |            |                    | 12.975       |            |
| 7   | 593.1              | 0.267        | $\pm 1/2$  | 592.0              | 1.116        | $\pm 1/2$  |
|     |                    | 1.130        |            |                    | 3.540        |            |
|     |                    | 17.742       |            |                    | 13.432       |            |
| 8   | 657.8              | 0.083        | $\pm 9/2$  | 644.4              | 0.262        | $\pm 7/2$  |
|     |                    | 0.220        |            |                    | 0.670        |            |
|     |                    | 19.256       |            |                    | 17.985       |            |

| KDs | 2(Dy1)             |        |            | 2(Dy2)             |        |            |
|-----|--------------------|--------|------------|--------------------|--------|------------|
|     | $E/\text{cm}^{-1}$ | $g$    | $m_J$      | $E/\text{cm}^{-1}$ | $g$    | $m_J$      |
| 1   | 0.0                | 0.002  | $\pm 15/2$ | 0.0                | 0.002  | $\pm 15/2$ |
|     |                    | 0.003  |            |                    | 0.003  |            |
|     |                    | 19.753 |            |                    | 19.683 |            |
| 2   | 243.1              | 0.077  | $\pm 13/2$ | 243.6              | 0.075  | $\pm 13/2$ |
|     |                    | 0.095  |            |                    | 0.093  |            |
|     |                    | 16.761 |            |                    | 16.752 |            |
| 3   | 387.0              | 0.629  | $\pm 11/2$ | 387.8              | 0.621  | $\pm 11/2$ |
|     |                    | 0.688  |            |                    | 0.681  |            |
|     |                    | 13.729 |            |                    | 13.741 |            |
| 4   | 483.0              | 2.971  | $\pm 9/2$  | 484.2              | 2.998  | $\pm 9/2$  |
|     |                    | 3.286  |            |                    | 3.309  |            |
|     |                    | 10.273 |            |                    | 10.268 |            |
| 5   | 538.6              | 3.112  | $\pm 5/2$  | 540.3              | 3.088  | $\pm 5/2$  |
|     |                    | 5.556  |            |                    | 5.541  |            |
|     |                    | 11.313 |            |                    | 11.278 |            |
| 6   | 594.5              | 0.557  | $\pm 1/2$  | 596.0              | 0.568  | $\pm 1/2$  |
|     |                    | 2.414  |            |                    | 2.448  |            |
|     |                    | 13.287 |            |                    | 13.220 |            |
| 7   | 622.9              | 0.257  | $\pm 3/2$  | 624.2              | 0.258  | $\pm 3/2$  |
|     |                    | 0.577  |            |                    | 0.568  |            |
|     |                    | 14.922 |            |                    | 14.859 |            |
| 8   | 673.6              | 0.225  | $\pm 7/2$  | 674.9              | 0.227  | $\pm 7/2$  |
|     |                    | 0.502  |            |                    | 0.517  |            |
|     |                    | 18.043 |            |                    | 18.019 |            |

**Table S7** Wave functions with definite projection of the total moment  $|m_J\rangle$  for the lowest two KDs of individual Dy<sup>III</sup> fragments for complexes **1** and **2**.

|               | $E/\text{cm}^{-1}$ | wave functions                                                             |
|---------------|--------------------|----------------------------------------------------------------------------|
| <b>1(Dy1)</b> | 0.0                | 97.6% $ \pm 15/2\rangle$                                                   |
|               | 240.5              | 85.2% $ \pm 13/2\rangle$ +10.0% $ \pm 9/2\rangle$                          |
| <b>1(Dy2)</b> | 0.0                | 91.9% $ \pm 15/2\rangle$                                                   |
|               | 167.2              | 86.6% $ \pm 13/2\rangle$ +10.5% $ \pm 9/2\rangle$                          |
| <b>2(Dy1)</b> | 0.0                | 97.6% $ \pm 15/2\rangle$                                                   |
|               | 243.1              | 82.3% $ \pm 13/2\rangle$ +10.2% $ \pm 9/2\rangle$ +4.4% $ \pm 11/2\rangle$ |
| <b>2(Dy2)</b> | 0.0                | 97.6% $ \pm 15/2\rangle$                                                   |
|               | 243.6              | 82.8% $ \pm 13/2\rangle$ +10.0% $ \pm 9/2\rangle$ +4.3% $ \pm 11/2\rangle$ |

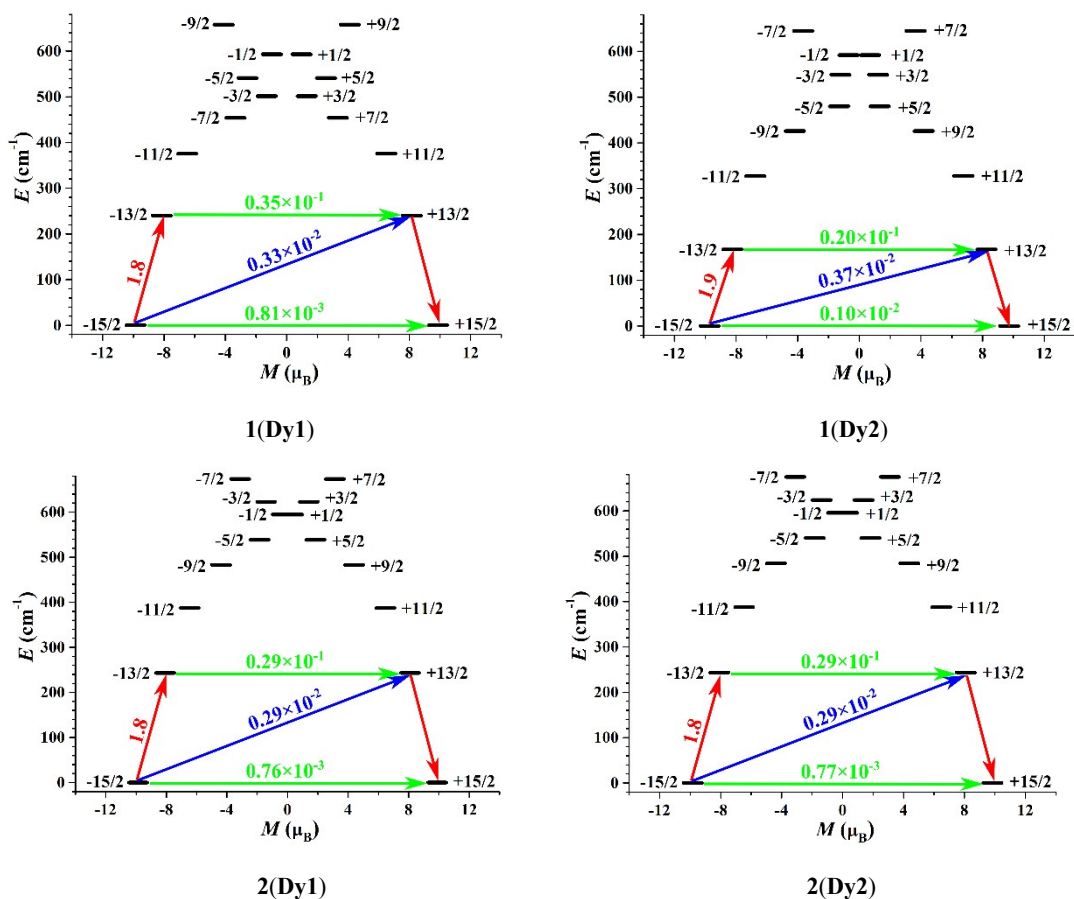

**Fig. S11** Magnetization blocking barriers for individual Dy<sup>III</sup> fragments in **1** and **2**. The thick black lines represent the KDs as a function of their magnetic moment along the magnetic axis. The green lines correspond to diagonal quantum tunneling of magnetization (QTM); the blue line represent off-diagonal relaxation process. The numbers at each arrow stand for the mean absolute value of the corresponding matrix element of transition magnetic moment.

To fit the exchange interactions in complexes **1** and **2**, we took two steps to obtain them. Firstly, we calculated individual Dy<sup>III</sup> fragments using CASSCF/RASSI-SO to obtain the corresponding magnetic properties. Then, the exchange interactions between the magnetic centers were considered within the Lines model,<sup>S3</sup> while the account of the dipole-dipole magnetic couplings were treated exactly. The Lines model is effective and has been successfully used widely in the research field of *d* and *f*-elements single-molecule magnets.<sup>S4</sup>

For complexes **1** and **2**, there is only one type of  $\mathcal{J}$ .

The Ising exchange Hamiltonian is:

$$\hat{H}_{exch} = -\mathcal{J} \hat{S}_{Dy1}^z \hat{S}_{Dy2}^z \quad (1)$$

The  $\mathcal{J}_{total}^{\%}$  is the parameter of the total magnetic interaction ( $\mathcal{J}_{total}^{\%} = \mathcal{J}_{dip}^{\%} + \mathcal{J}_{exch}^{\%}$ ) between magnetic center ions. The  $S_{By} = 1/2$  is the ground pseudospin on the Dy<sup>III</sup> site. The dipolar magnetic coupling can be calculated exactly, while the exchange coupling constant was fitted through comparison of the computed and measured magnetic susceptibilities using the POLY\_ANISO program.<sup>S2</sup>

**Table S8** Exchange energies  $E$  (cm<sup>-1</sup>), the energy difference between each exchange doublets  $\Delta_t$  (cm<sup>-1</sup>) and the main values of the  $g_z$  for the lowest two exchange doublets of **1** and **2**.

|   | <b>1</b> |                       |        | <b>2</b> |                       |        |
|---|----------|-----------------------|--------|----------|-----------------------|--------|
|   | $E$      | $\Delta_t$            | $g_z$  | $E$      | $\Delta_t$            | $g_z$  |
| 1 | 0.00     | $0.76 \times 10^{-7}$ | 38.567 | 0.00     | $0.62 \times 10^{-7}$ | 38.129 |
| 2 | 1.10     | $0.15 \times 10^{-6}$ | 6.750  | 1.31     | $0.12 \times 10^{-6}$ | 10.069 |

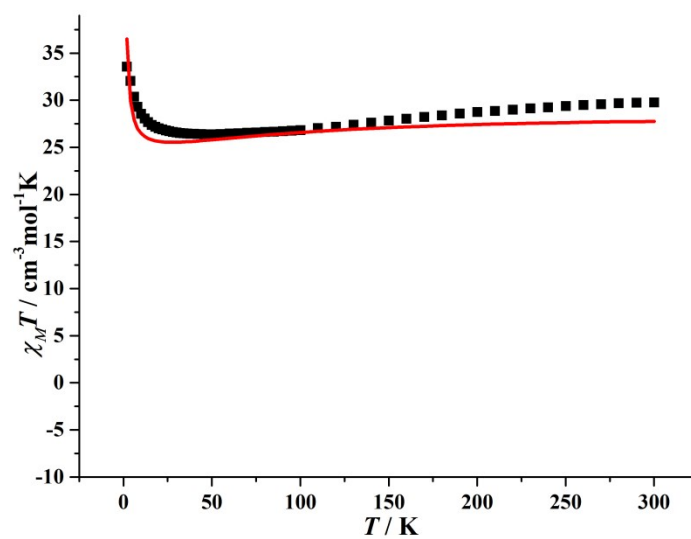

1

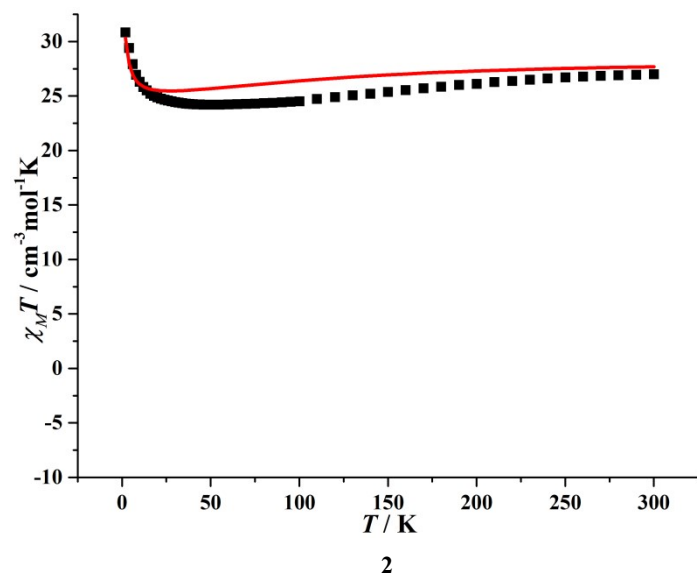

**Fig. S12** Calculated (red solid line) and experimental (black square dot) data of magnetic susceptibilities of **1** and **2**. The intermolecular interactions  $zJ'$  of **1** and **2** were fitted to 0.01 and  $-0.01 \text{ cm}^{-1}$ , respectively.

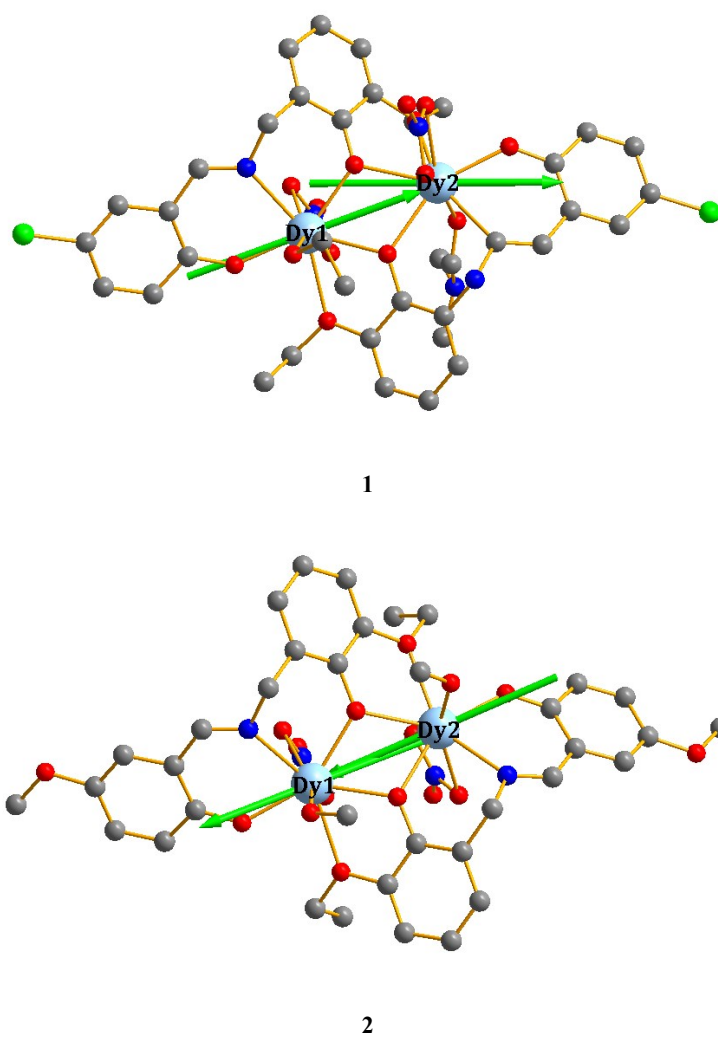

**Fig. S13** Calculated orientations of the local main magnetic axes on  $\text{Dy}^{\text{III}}$  of complexes **1** and **2**.

## References:

- S1 (a) X. F. Ma, B. B. Chen, Y. Q. Zhang, J. H. Yang, Q. Shi, Y. L. Ma and X. Y. Liu, *Dalton Trans.*, **2019**, 48, 12622; (b) P. H. Lin, T. J. Burchell, R. Clerac and M. Murugesu, *Angew. Chem., Int. Ed.*, **2008**, 47, 8848; (c) Y. Qin, H. F. Zhang, H. Sun, Y. D. Pan, Y. H. Ge, Y. H. Li and Y. Q. Zhang, *Chem. -Asian J.*, **2017**, 12, 2834; (d) Y. R. Qin, Y. Jing, Y. Ge, W. Liu, Y. H. Li and Y. Q. Zhang, *Dalton Trans.*, **2018**, 48, 15197; (e) K. Zhang, C. Yuan, F. S. Guo, Y. Q. Zhang and Y. Y. Wang, *Dalton Trans.*, **2016**, 46, 186; (f) Y. Ge, Y. Huang, J. L. B. Montenegro, Y. F. Cui, W. Liu, Y. H. Li and B. L. Wang, *Chem. -Asian J.*, **2018**, 14, 986.
- S2 F. Aquilante, J. Autschbach, R. K. Carlson, L. F. Chibotaru, M. G. Delcey, L. De Vico, I. Fdez. Galván, N. Ferré, L. M. Frutos, L. Gagliardi, M. Garavelli, A. Giussani, C. E. Hoyer, G. Li Manni, H. Lischka, D. Ma, P. Å. Malmqvist, T. Müller, A. Nenov, M. Olivucci, T. B. Pedersen, D. Peng, F. Plasser, B. Pritchard, M. Reiher, I. Rivalta, I. Schapiro, J. Segarra-Martí, M. Stenrup, D. G. Truhlar, L. Ungur, A. Valentini, S. Vancoillie, V. Veryazov, V. P. Vysotskiy, O. Weingart, F. Zapata, R. Lindh, MOLCAS 8: New Capabilities for Multiconfigurational Quantum Chemical Calculations across the Periodic Table, *J. Comput. Chem.* **2016**, 37, 506.
- S3 (a) L. F. Chibotaru, L. Ungur, A. Soncini, *Angew. Chem., Int. Ed.*, **2008**, 47, 4126. (b) L. Ungur, W. Van den Heuvel, L. F. Chibotaru, *New J. Chem.* **2009**, 33, 1224. (c) L. F. Chibotaru, L. Ungur, C. Aronica, H. Elmoll, G. Pilet, D. Luneau, *J. Am. Chem. Soc.* **2008**, 130, 12445-12455.
- S4 Lines, M. E. *J. Chem. Phys.* **1971**, 55, 2977-2984.
- S5 (a) K. C. Mondal, A. Sundt, Y. H. Lan, G. E. Kostakis, O. Waldmann, L. Ungur, L. F. Chibotaru, C. E. Anson, A. K. Powell, *Angew. Chem., Int. Ed.* **2012**, 51, 7550. (b) S. K. Langley, D. P. Wielechowski, V. Vieru, N. F. Chilton, B. Moubaraki, B. F. Abrahams, L. F. Chibotaru, K. S. Murray, *Angew. Chem., Int. Ed.* **2013**, 52, 12014-12019.
